# Supplementary material for: Cancer Wars: Revenge of the AMPs (Antimicrobial Peptides), a New Strategy against Colorectal Cancer
Source: MDPI journal article supplement (doi:10.3390/toxins15070459), 2023-07-14
Supplement: s1 [file s1]

## Supplementary Information

to

### Cancer Wars: Revenge of the AMPs (Antimicrobial peptides), a new strategy against colorectal cancer

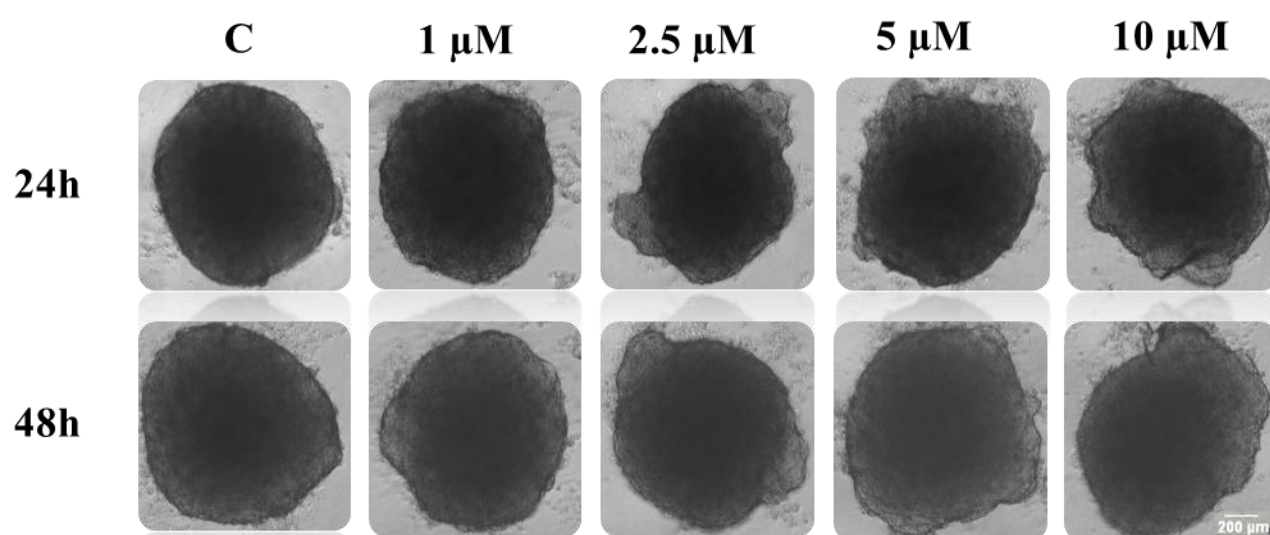

**Figure. S1** The cytotoxic effects of CA on HT-29 spheroids. The spheroids were obtained after seeding 5000 cells/well and they were incubated for three days. On the third day of growth, the spheroids were treated with various concentrations of CA (1, 2.5, 5 and 10  $\mu$ M). Images were taken with the help of light microscopy a 24 and 48 h, with the 4x objective. The scale bar is 200  $\mu$ m and is identical for all the images.



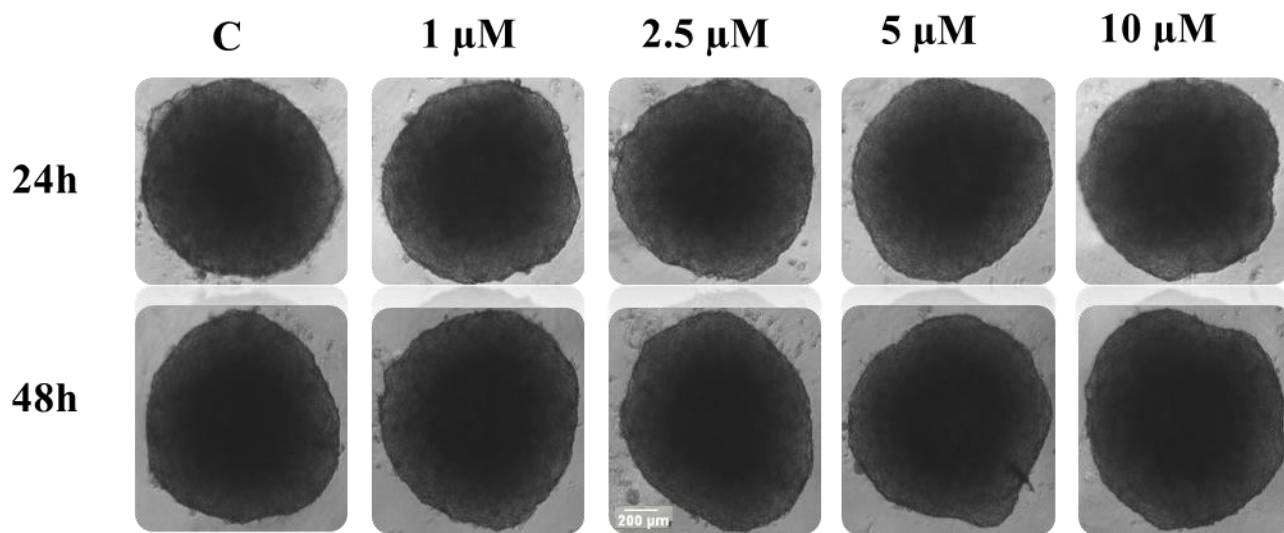

**Figure. S2** The cytotoxic effects of CA-Mel on HT-29 spheroids. The spheroids were obtained after seeding 5000 cells/well and they were incubated for three days. On the third day of growth, the spheroids were treated with various concentrations of CA-Mel (1, 2.5, 5 and 10  $\mu$ M). Images were taken with the help of light microscopy a 24 and 48 h, with the 4x objective. The scale bar is 200  $\mu$ m and is identical for all the images.

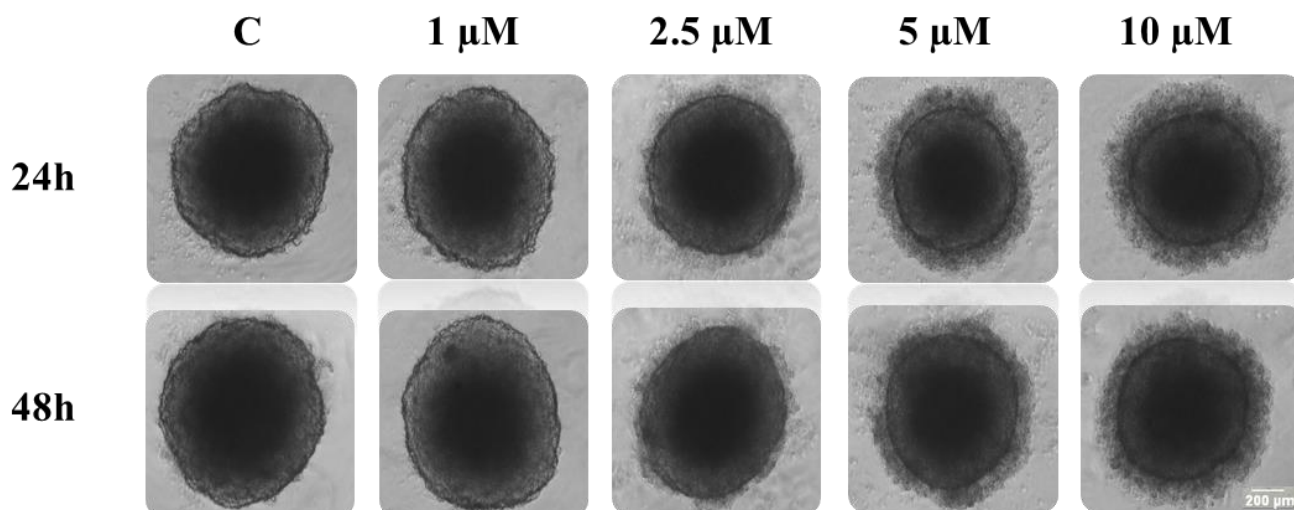

**Figure. S3** The cytotoxic effects of Mel on HCT-116 spheroids. The spheroids were obtained after seeding 5000 cells/well and they were incubated for three days. On the third day of growth, the spheroids were treated with various concentrations of melittin (1, 2.5, 5 and 10  $\mu$ M). Images were taken with the help of light microscopy a 24 and 48 h, with the 4x objective. The scale bar is 200  $\mu$ m and is identical for all the images.



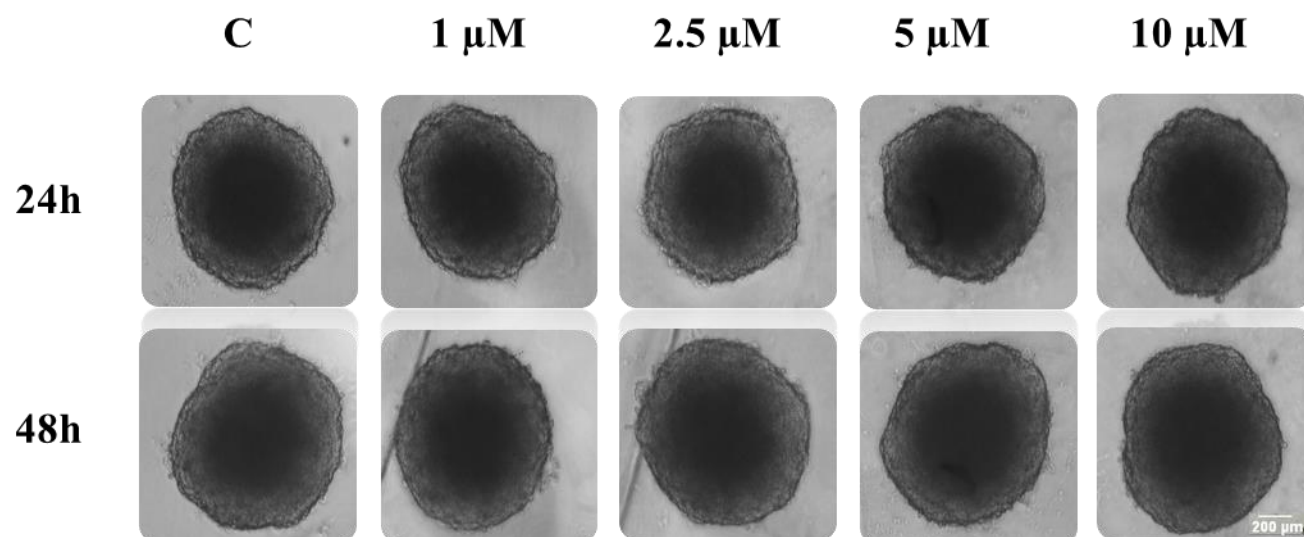

**Figure. S4** The cytotoxic effects of CA on HCT-116 spheroids. The spheroids were obtained after seeding 5000 cells/well and they were incubated for three days. On the third day of growth, the spheroids were treated with various concentrations of CA (1, 2.5, 5 and 10  $\mu$ M). Images were taken with the help of light microscopy a 24 and 48 h, with the 4x objective. The scale bar is 200  $\mu$ m and is identical for all the images.

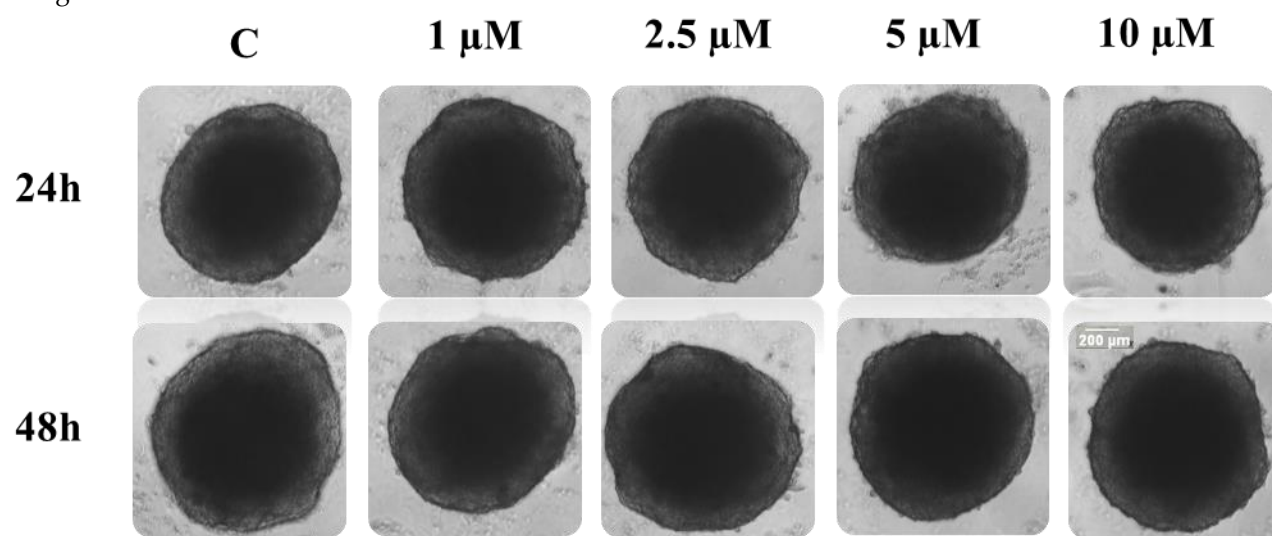

**Figure. S5** The cytotoxic effects of CA-Mel on HCT-116 spheroids. The spheroids were obtained after seeding 5000 cells/well and they were incubated for three days. On the third day of growth, the spheroids were treated with various concentrations of CA-Mel (1, 2.5, 5 and 10  $\mu$ M). Images were taken with the help of light microscopy a 24 and 48 h, with the 4x objective. The scale bar is 200  $\mu$ m and is identical for all the images.
